# Supplementary material
Source: PubMed Central journal article supplement (PMC5001807)
Supplement: NIHMS811262-supplement-Supplemental.pdf [file NIHMS811262-supplement-Supplemental.pdf]

Supporting Information for  
Mapping Allostery through Computational Glycine Scanning and  
Correlation Analysis of Residue-Residue Contacts

by Quentin R. Johnson, Richard J. Lindsay, Ricky B. Nellas,  
Elias J. Fernandez, and Tongye Shen

Table S1: 18 residues of the binding pocket of RXR and their interactions with 9C.

| Index | Residue | Internal ID | Potential Interactions |
|-------|---------|-------------|------------------------|
| 1     | V265    | 298         | ring, C18              |
| 2     | C269    | 302         | C18                    |
| 3     | A271    | 304         | COO                    |
| 4     | A272    | 305         | C11, C12               |
| 5     | Q275    | 308         | COO                    |
| 6     | L309    | 342         | C12                    |
| 7     | I310    | 343         | C9,C18                 |
| 8     | F313    | 346         | C12-COO                |
| 9     | R316    | 349         | COO                    |
| 10    | A327    | 360         | COO                    |
| 11    | I345    | 378         | C2, ring               |
| 12    | F346    | 379         | C2, ring               |
| 13    | V349    | 382         | C16, ring              |
| 14    | C432    | 465         | C17                    |
| 15    | L433    | 466         | C19                    |
| 16    | H435    | 468         | ring                   |
| 17    | L436    | 469         | C7-C9,C19              |
| 18    | F439    | 472         | C18                    |

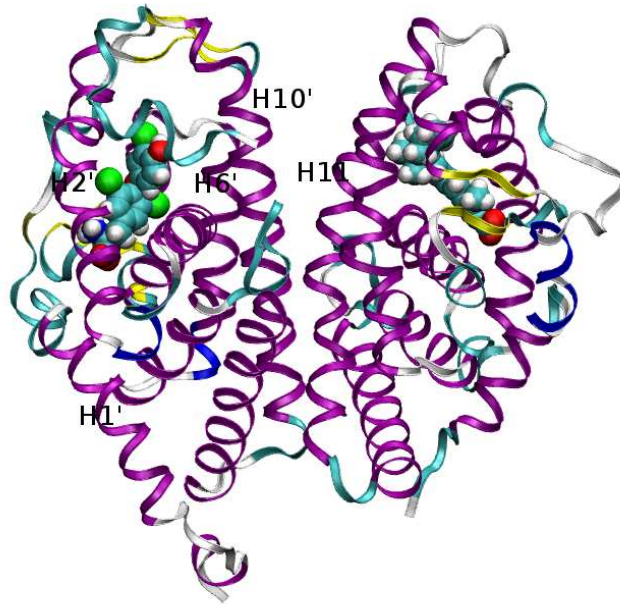

Fig. S 1: A cartoon representation of the TR:RXR complex with important helices labeled.

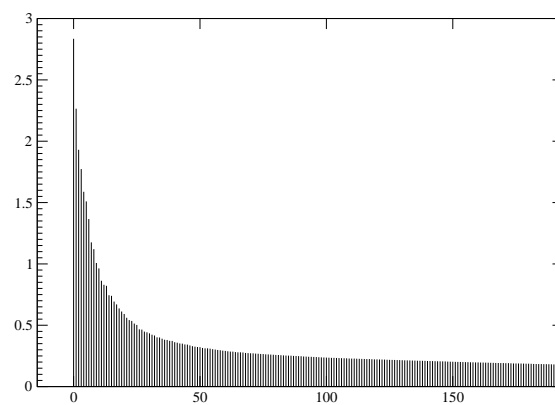

Fig. S 2: The eigenvalues for the diagonalization of the covariance matrix of the contacts. Since the summation of all the eigenvalues is 104.781 (close to 100), the data also closely represents each eigenvalue as the percentage that is normalized by the sum.

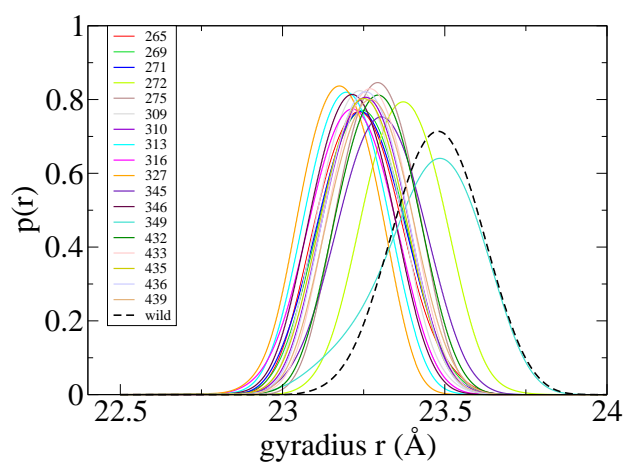

Fig. S 3: The probability distribution of the radius of gyration for each system.

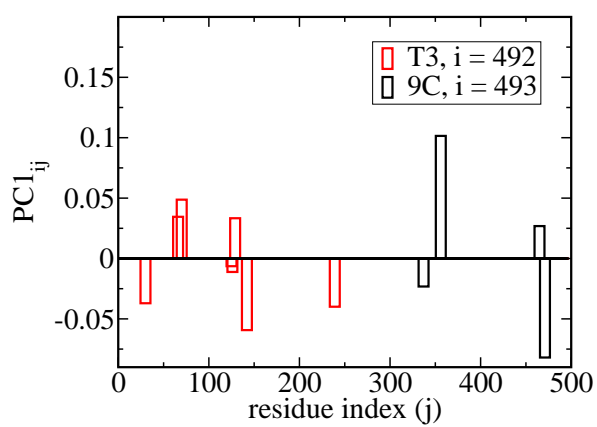

Fig. S 4: The individual components of PC 1 describe the changes of protein-ligand contact formation.

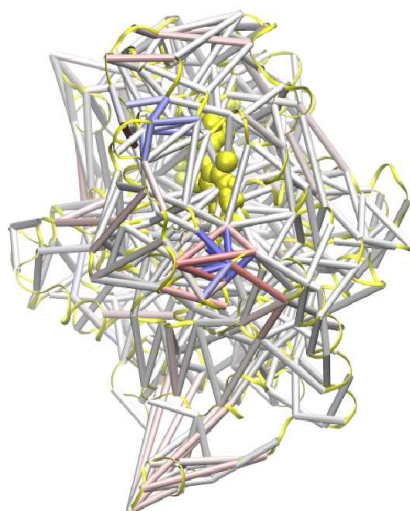

Fig. S 5: A side view (TR side) of PC1 displayed on the 3D cylindrical representation.

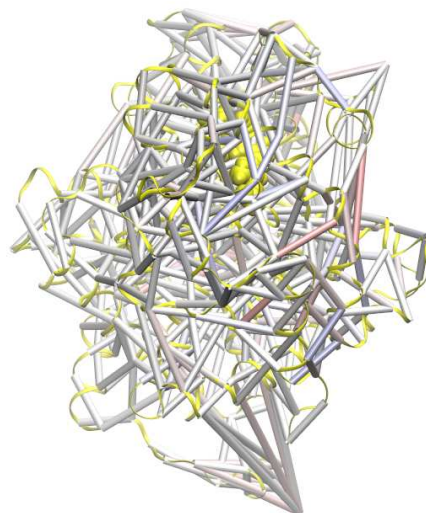

Fig. S 6: A side view (RXR side) of PC1 displayed on the 3D cylindrical representation.

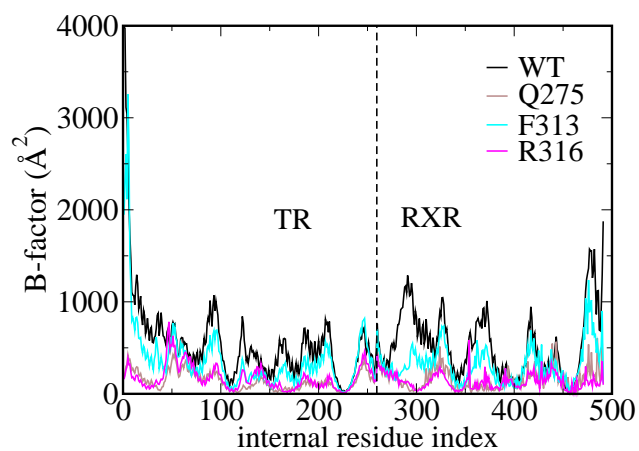

Fig. S 7: The computational B-factor of the protein complex (wild type and selected mutants).

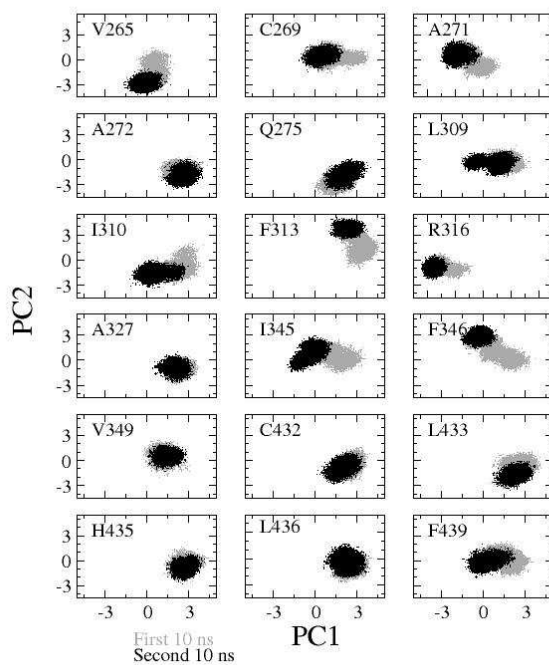

Fig. S 8: To inspect the dynamics, the conformations of the mutants (projected onto PC1 vs PC2) are split into two halves: the first (grey) and second (black) half.
